# Supplementary material for: Antigenic sin of wild-type SARS-CoV-2 vaccine shapes poor cross-neutralization of BA.4/5/2.75 subvariants in BA.2 breakthrough infections
Source: PubMed Central journal article supplement (PMC9675777; doi:10.1038/s41467-022-34400-8), 2022-11-19
Supplement: 41467_2022_34400_MOESM1_ESM.pdf [file 41467_2022_34400_MOESM1_ESM.pdf]

## Supplementary information

### **Antigenic sin of wild-type SARS-CoV-2 vaccine shapes poor cross-neutralization of BA.4/5/2.75 subvariants in BA.2 breakthrough infections**

Bin Ju<sup>1,2,3,\*,#</sup>, Qing Fan<sup>1,2,\*</sup>, Miao Wang<sup>1,2,\*</sup>, Xuejiao Liao<sup>1,2</sup>, Huimin Guo<sup>1,2</sup>, Haiyan Wang<sup>1,2</sup>, Xiangyang Ge<sup>1,2</sup>, Lei Liu<sup>1,2</sup>, Zheng Zhang<sup>1,2,3,4,#</sup>

<sup>1</sup>Institute for Hepatology, National Clinical Research Center for Infectious Disease, Shenzhen Third People's Hospital, Shenzhen 518112, Guangdong Province, China.

<sup>2</sup>The Second Affiliated Hospital, School of Medicine, Southern University of Science and Technology, Shenzhen 518112, Guangdong Province, China.

<sup>3</sup>Guangdong Key Laboratory for Anti-infection Drug Quality Evaluation, Shenzhen 518112, Guangdong Province, China.

<sup>4</sup>Shenzhen Research Center for Communicable Disease Diagnosis and Treatment of Chinese Academy of Medical Science, Shenzhen 518112, Guangdong Province, China.

\*These authors contributed equally: Bin Ju, Qing Fan, and Miao Wang.

#Correspondence:

zhangzheng1975@aliyun.com (Zheng Zhang)

jubin2013@163.com (Bin Ju)

Supplementary information

Supplementary Figures 1-2

Supplementary Tables 1-3

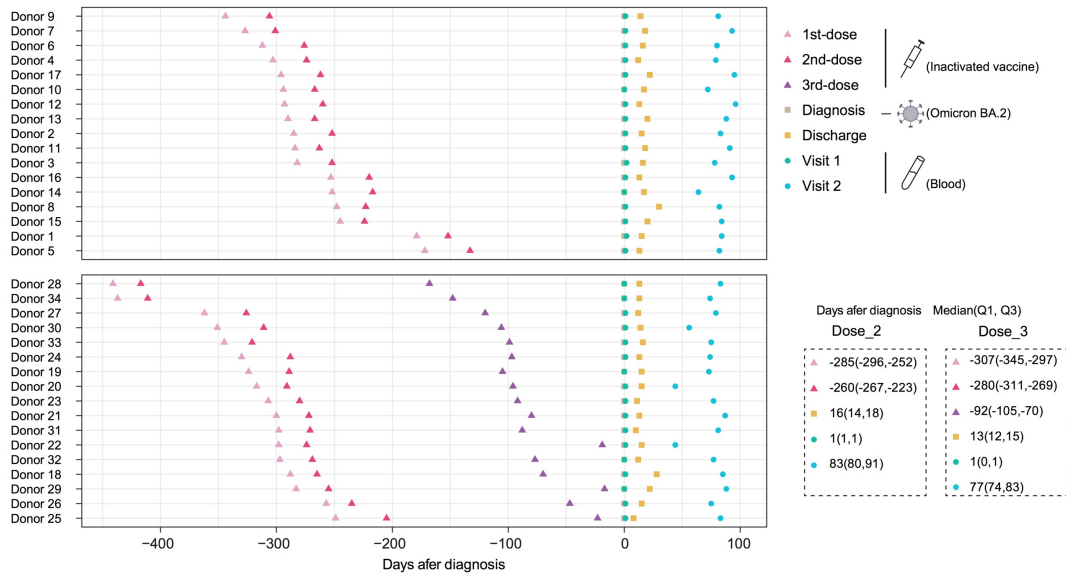

**Supplementary Fig. 1 Timeline of events during wild-type SARS-CoV-2 inactivated vaccination, BA.2 breakthrough infection, and follow-up visit.** Key events included two or three doses of inactivated vaccines, diagnosis, discharge, and two follow-up visits. The diagnosis date was normalized to Day 0 and the median time (IQR) to each stage marked on the right. The green and blue dots indicate blood samples collected at Visit 1 and Visit 2, respectively. Source data are provided as a Source Data file.

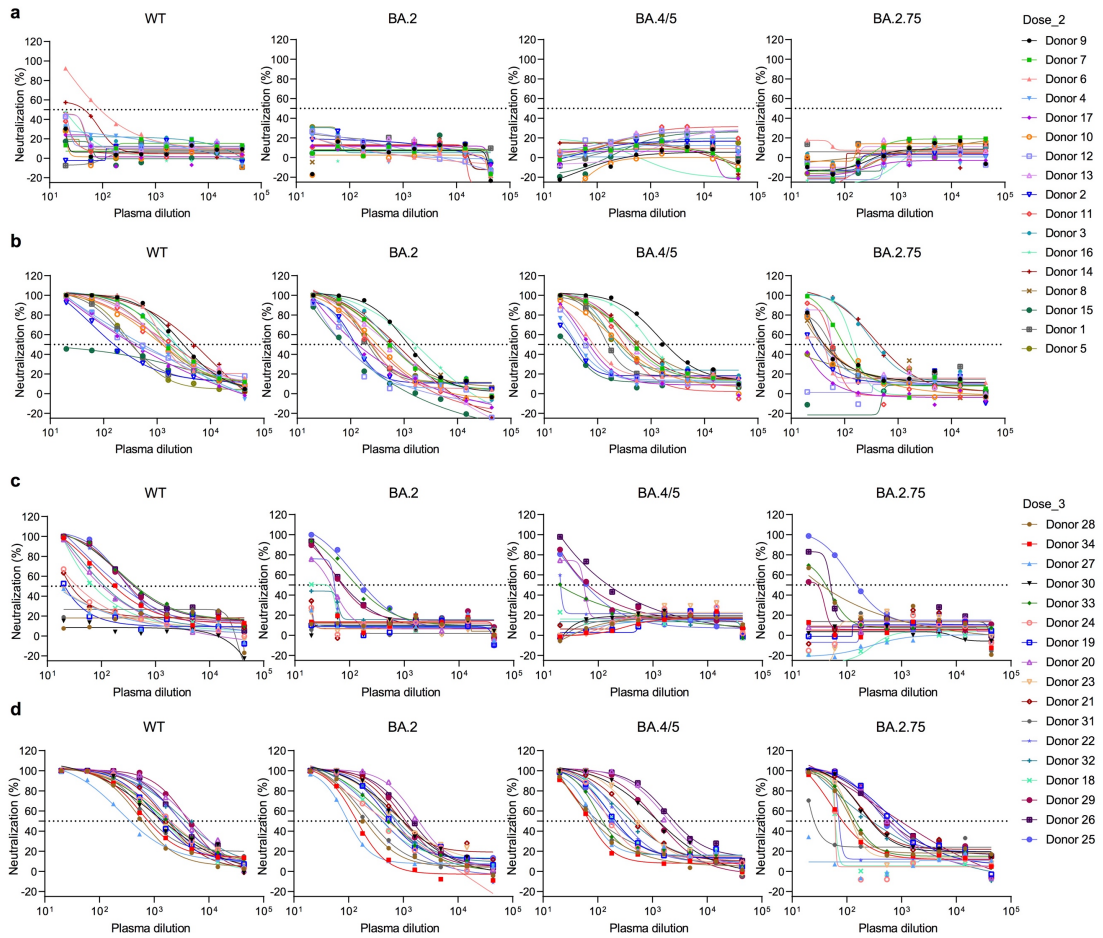

**Supplementary Fig. 2** The plasma neutralization of 2-dose individuals ( $n = 17$ ) at Visit 1 (a) and Visit 2 (b), and 3-dose individuals ( $n = 17$ ) at Visit 1 (c) and Visit 2 (d) against the WT SARS-CoV-2 and Omicron subvariants. One representative curve from at least two independent experiments was displayed. A cut-off value of 50% is indicated by the dotted horizontal line in neutralization. Source data are provided as a Source Data file.

**Supplementary Table 1 Detailed information of study subjects.**

| Donor    | Gender | Age (range) | Group  | 1st-dose vaccination |            | 2nd-dose vaccination |            | 3rd-dose vaccination |            | Diagnosis | Discharge | Blood sampling (Visit 1 and Visit 2) |                     |
|----------|--------|-------------|--------|----------------------|------------|----------------------|------------|----------------------|------------|-----------|-----------|--------------------------------------|---------------------|
|          |        |             |        | Date                 | Vaccine    | Date                 | Vaccine    | Date                 | Vaccine    |           |           | Early stage of infection             | Convalescent period |
| Donor 1  | Female | 61-70       | Dose_2 | 2021/9/20            | CoronaVac  | 2021/10/17           | CoronaVac  | /                    | /          | 2022/3/18 | 2022/4/2  | 2022/3/20                            | 2022/6/10           |
| Donor 2  | Male   | 31-40       | Dose_2 | 2021/6/5             | CoronaVac  | 2021/7/8             | CoronaVac  | /                    | /          | 2022/3/17 | 2022/4/1  | 2022/3/18                            | 2022/6/8            |
| Donor 3  | Male   | 41-50       | Dose_2 | 2021/6/8             | CoronaVac  | 2021/7/8             | CoronaVac  | /                    | /          | 2022/3/17 | 2022/4/2  | 2022/3/19                            | 2022/6/3            |
| Donor 4  | Female | 41-50       | Dose_2 | 2021/5/12            | CoronaVac  | 2021/6/10            | CoronaVac  | /                    | /          | 2022/3/11 | 2022/3/23 | 2022/3/12                            | 2022/5/29           |
| Donor 5  | Female | 21-30       | Dose_2 | 2021/9/25            | CoronaVac  | 2021/11/3            | CoronaVac  | /                    | /          | 2022/3/16 | 2022/3/29 | 2022/3/17                            | 2022/6/6            |
| Donor 6  | Male   | 51-60       | Dose_2 | 2021/4/30            | CoronaVac  | 2021/6/5             | CoronaVac  | /                    | /          | 2022/3/8  | 2022/3/24 | 2022/3/9                             | 2022/5/27           |
| Donor 7  | Female | 31-40       | Dose_2 | 2021/4/23            | CoronaVac  | 2021/5/19            | CoronaVac  | /                    | /          | 2022/3/16 | 2022/4/3  | 2022/3/17                            | 2022/6/17           |
| Donor 8  | Female | 21-30       | Dose_2 | 2021/7/8             | CoronaVac  | 2021/8/2             | CoronaVac  | /                    | /          | 2022/3/13 | 2022/4/12 | 2022/3/14                            | 2022/6/3            |
| Donor 9  | Male   | 21-30       | Dose_2 | 2021/4/2             | BBIBP-CorV | 2021/5/10            | BBIBP-CorV | /                    | /          | 2022/3/12 | 2022/3/26 | 2022/3/13                            | 2022/6/1            |
| Donor 10 | Female | 31-40       | Dose_2 | 2021/5/28            | BBIBP-CorV | 2021/6/24            | BBIBP-CorV | /                    | /          | 2022/3/18 | 2022/4/4  | 2022/3/18                            | 2022/5/29           |
| Donor 11 | Female | 21-30       | Dose_2 | 2021/6/5             | BBIBP-CorV | 2021/6/26            | BBIBP-CorV | /                    | /          | 2022/3/16 | 2022/4/3  | 2022/3/17                            | 2022/6/15           |
| Donor 12 | Female | 41-50       | Dose_2 | 2021/5/22            | BBIBP-CorV | 2021/6/24            | BBIBP-CorV | /                    | /          | 2022/3/11 | 2022/3/24 | 2022/3/12                            | 2022/6/15           |
| Donor 13 | Female | 41-50       | Dose_2 | 2021/5/26            | CoronaVac  | 2021/6/18            | CoronaVac  | /                    | /          | 2022/3/12 | 2022/4/1  | 2022/3/13                            | 2022/6/8            |
| Donor 14 | Female | 61-70       | Dose_2 | 2021/7/4             | BBIBP-CorV | 2021/8/8             | CoronaVac  | /                    | /          | 2022/3/13 | 2022/3/30 | 2022/3/13                            | 2022/5/16           |
| Donor 15 | Female | 61-70       | Dose_2 | 2021/7/18            | BBIBP-CorV | 2021/8/8             | BBIBP-CorV | /                    | /          | 2022/3/20 | 2022/4/9  | 2022/3/21                            | 2022/6/12           |
| Donor 16 | Female | 61-70       | Dose_2 | 2021/7/1             | KCONVAC    | 2021/8/3             | KCONVAC    | /                    | /          | 2022/3/11 | 2022/3/24 | 2022/3/12                            | 2022/6/12           |
| Donor 17 | Female | 21-30       | Dose_2 | 2021/5/22            | WIBP-CroV  | 2021/6/25            | WIBP-CroV  | /                    | /          | 2022/3/14 | 2022/4/5  | 2022/3/15                            | 2022/6/17           |
| Donor 18 | Male   | 51-60       | Dose_3 | 2021/5/31            | CoronaVac  | 2021/6/23            | CoronaVac  | 2022/1/4             | CoronaVac  | 2022/3/15 | 2022/4/12 | 2022/3/16                            | 2022/6/8            |
| Donor 19 | Male   | 31-40       | Dose_3 | 2021/4/27            | CoronaVac  | 2021/6/1             | CoronaVac  | 2021/12/2            | CoronaVac  | 2022/3/17 | 2022/4/1  | 2022/3/17                            | 2022/5/29           |
| Donor 20 | Male   | 31-40       | Dose_3 | 2021/5/17            | CoronaVac  | 2021/6/12            | CoronaVac  | 2021/12/24           | CoronaVac  | 2022/3/30 | 2022/4/14 | 2022/3/31                            | 2022/5/13           |
| Donor 21 | Male   | 31-40       | Dose_3 | 2021/5/19            | CoronaVac  | 2021/6/16            | CoronaVac  | 2021/12/25           | CoronaVac  | 2022/3/15 | 2022/3/28 | 2022/3/16                            | 2022/6/10           |
| Donor 22 | Female | 41-50       | Dose_3 | 2021/6/5             | CoronaVac  | 2021/6/29            | CoronaVac  | 2022/3/11            | CoronaVac  | 2022/3/30 | 2022/4/14 | 2022/3/31                            | 2022/5/13           |
| Donor 23 | Male   | 21-30       | Dose_3 | 2021/5/20            | CoronaVac  | 2021/6/16            | CoronaVac  | 2021/12/21           | CoronaVac  | 2022/3/23 | 2022/4/3  | 2022/3/24                            | 2022/6/8            |
| Donor 24 | Female | 31-40       | Dose_3 | 2021/4/20            | CoronaVac  | 2021/6/1             | CoronaVac  | 2021/12/9            | CoronaVac  | 2022/3/16 | 2022/3/29 | 2022/3/17                            | 2022/5/29           |
| Donor 25 | Male   | 21-30       | Dose_3 | 2021/7/22            | CoronaVac  | 2021/9/4             | CoronaVac  | 2022/3/5             | CoronaVac  | 2022/3/28 | 2022/4/5  | 2022/3/29                            | 2022/6/19           |
| Donor 26 | Male   | 31-40       | Dose_3 | 2021/7/1             | BBIBP-CorV | 2021/7/23            | CoronaVac  | 2022/1/27            | CoronaVac  | 2022/3/15 | 2022/3/30 | 2022/3/16                            | 2022/5/29           |
| Donor 27 | Female | 21-30       | Dose_3 | 2021/3/15            | BBIBP-CorV | 2021/4/20            | BBIBP-CorV | 2021/11/12           | BBIBP-CorV | 2022/3/12 | 2022/3/24 | 2022/3/13                            | 2022/5/30           |
| Donor 28 | Male   | 31-40       | Dose_3 | 2020/12/31           | BBIBP-CorV | 2021/1/24            | BBIBP-CorV | 2021/9/30            | BBIBP-CorV | 2022/3/17 | 2022/3/30 | 2022/3/17                            | 2022/6/8            |
| Donor 29 | Male   | 31-40       | Dose_3 | 2021/6/2             | KCONVAC    | 2021/6/30            | KCONVAC    | 2022/2/23            | KCONVAC    | 2022/3/12 | 2022/4/3  | 2022/3/12                            | 2022/6/8            |
| Donor 30 | Male   | 41-50       | Dose_3 | 2021/4/4             | BBIBP-CorV | 2021/5/14            | BBIBP-CorV | 2021/12/5            | BBIBP-CorV | 2022/3/21 | 2022/4/4  | 2022/3/22                            | 2022/5/16           |
| Donor 31 | Male   | 31-40       | Dose_3 | 2021/5/23            | BBIBP-CorV | 2021/6/19            | BBIBP-CorV | 2021/12/19           | BBIBP-CorV | 2022/3/17 | 2022/3/27 | 2022/3/18                            | 2022/6/6            |
| Donor 32 | Female | 41-50       | Dose_3 | 2021/5/23            | BBIBP-CorV | 2021/6/20            | BBIBP-CorV | 2021/12/29           | BBIBP-CorV | 2022/3/16 | 2022/3/28 | 2022/3/16                            | 2022/6/1            |
| Donor 33 | Male   | 31-40       | Dose_3 | 2021/4/9             | BBIBP-CorV | 2021/5/3             | BBIBP-CorV | 2021/12/11           | BBIBP-CorV | 2022/3/20 | 2022/4/5  | 2022/3/21                            | 2022/6/3            |
| Donor 34 | Male   | 31-40       | Dose_3 | 2021/1/3             | BBIBP-CorV | 2021/1/29            | BBIBP-CorV | 2021/10/19           | BBIBP-CorV | 2022/3/16 | 2022/3/29 | 2022/3/16                            | 2022/5/29           |

**Supplementary Table 2 Summary demographic characteristics of SARS-CoV-2 BA.2 breakthrough infected patients in this study.**

|                                          | Dose_2<br>(n = 17) | Dose_3<br>(n = 17) | Total<br>(n = 34)     | P values <sup>#</sup><br>Dose_2 vs Dose_3 |
|------------------------------------------|--------------------|--------------------|-----------------------|-------------------------------------------|
| Median age (range)                       | 41(22-64)          | 35(21-51)          | 36(21-64)             | 0.546                                     |
| Male(n, %)                               | 4(23.53)           | 13(76.47)          | 17(50.00)             | 0.0025                                    |
| 1st-dose to diagnosis,<br>(median, IQR)  | -285(-296,-252)    | -307(-345,-297)    | -296.5(-322.2,-282.2) | 0.0072                                    |
| 2nd-dose to diagnosis,<br>(median, IQR)  | -260(-267,-223)    | -280(-311,-269)    | -268(-288.8,-252)     | 0.0062                                    |
| 3rd-dose to diagnosis,<br>(median, IQR)  | -                  | -92(-105,-70)      | -92(-105,-70)         | -                                         |
| Discharge to diagnosis,<br>(median, IQR) | 16(14,18)          | 13(12,15)          | 15(13,17)             | 0.024                                     |
| Visit 1 to diagnosis,<br>(median, IQR)   | 1(1,1)             | 1(0,1)             | 1(1,1)                | 0.0982                                    |
| Visit 2 to diagnosis,<br>(median, IQR)   | 83(80,91)          | 77(74,83)          | 81(75,84.75)          | 0.0151                                    |
| 1st-dose to 2nd-dose,<br>(median, IQR)   | 30(26,34)          | 27(24,35)          | 28(25.25,34.75)       | 0.743                                     |
| 2nd-dose to 3rd-dose,<br>(median, IQR)   | -                  | 195(188,222)       | 195(188,222)          | -                                         |

<sup>#</sup> Statistical significance was determined using two-tailed unpaired Wilcoxon test. IQR, interquartile range.

**Supplementary Table 3 The plasma neutralization of BA.2 breakthrough infected patients against the WT SARS-CoV-2 and Omicron subvariants.**

| Group  | Donor    | Visit 1 (Early stage of infection) |      |        |         | Visit 2 (Convalescent period) |      |        |         |
|--------|----------|------------------------------------|------|--------|---------|-------------------------------|------|--------|---------|
|        |          | WT                                 | BA.2 | BA.4/5 | BA.2.75 | WT                            | BA.2 | BA.4/5 | BA.2.75 |
| Dose_2 | Donor 1  | 20                                 | 20   | 20     | 20      | 306                           | 291  | 177    | 50      |
|        | Donor 2  | 20                                 | 20   | 20     | 20      | 174                           | 189  | 39     | 37      |
|        | Donor 3  | 20                                 | 20   | 20     | 20      | 2179                          | 783  | 256    | 434     |
|        | Donor 4  | 20                                 | 20   | 20     | 20      | 556                           | 115  | 43     | 41      |
|        | Donor 5  | 20                                 | 20   | 20     | 20      | 284                           | 291  | 269    | 20      |
|        | Donor 6  | 57                                 | 20   | 20     | 20      | 1639                          | 235  | 78     | 29      |
|        | Donor 7  | 20                                 | 20   | 20     | 20      | 1398                          | 599  | 461    | 87      |
|        | Donor 8  | 20                                 | 20   | 20     | 20      | 1263                          | 571  | 600    | 31      |
|        | Donor 9  | 20                                 | 20   | 20     | 20      | 3723                          | 1402 | 1613   | 39      |
|        | Donor 10 | 20                                 | 20   | 20     | 20      | 1283                          | 281  | 238    | 36      |
|        | Donor 11 | 20                                 | 20   | 20     | 20      | 1483                          | 308  | 298    | 60      |
|        | Donor 12 | 20                                 | 20   | 20     | 20      | 378                           | 132  | 51     | 20      |
|        | Donor 13 | 20                                 | 20   | 20     | 20      | 1544                          | 457  | 410    | 68      |
|        | Donor 14 | 33                                 | 20   | 20     | 20      | 4489                          | 876  | 506    | 481     |
|        | Donor 15 | 20                                 | 20   | 20     | 20      | 20                            | 110  | 26     | 20      |
|        | Donor 16 | 20                                 | 20   | 20     | 20      | 2158                          | 1622 | 954    | 240     |
|        | Donor 17 | 20                                 | 20   | 20     | 20      | 452                           | 169  | 64     | 20      |
| Dose_3 | Donor 18 | 122                                | 43   | 20     | 20      | 1348                          | 424  | 197    | 70      |
|        | Donor 19 | 37                                 | 20   | 20     | 20      | 1531                          | 615  | 195    | 961     |
|        | Donor 20 | 173                                | 44   | 45     | 20      | 5074                          | 1871 | 1919   | 522     |
|        | Donor 21 | 39                                 | 20   | 20     | 20      | 1965                          | 987  | 468    | 354     |
|        | Donor 22 | 324                                | 52   | 20     | 20      | 3049                          | 494  | 348    | 99      |
|        | Donor 23 | 20                                 | 20   | 20     | 20      | 1385                          | 871  | 575    | 149     |
|        | Donor 24 | 45                                 | 20   | 20     | 20      | 2509                          | 1939 | 162    | 62      |
|        | Donor 25 | 439                                | 210  | 53     | 155     | 1703                          | 783  | 188    | 529     |
|        | Donor 26 | 486                                | 76   | 131    | 44      | 2757                          | 1555 | 2975   | 602     |
|        | Donor 27 | 20                                 | 20   | 20     | 20      | 367                           | 91   | 103    | 20      |
|        | Donor 28 | 20                                 | 20   | 20     | 20      | 701                           | 218  | 71     | 147     |
|        | Donor 29 | 222                                | 70   | 54     | 45      | 4135                          | 1406 | 1209   | 734     |
|        | Donor 30 | 20                                 | 20   | 20     | 20      | 1703                          | 941  | 1239   | 368     |
|        | Donor 31 | 20                                 | 20   | 20     | 20      | 929                           | 269  | 121    | 40      |
|        | Donor 32 | 109                                | 20   | 20     | 20      | 3232                          | 739  | 488    | 215     |
|        | Donor 33 | 390                                | 150  | 20     | 58      | 2305                          | 536  | 144    | 135     |
|        | Donor 34 | 124                                | 20   | 20     | 20      | 1097                          | 179  | 79     | 72      |

The ID<sub>50</sub> values of each plasma were shown. The cut-off value of neutralization was set to 1:20 dilution. Non-neutralization data was set as 20 for analysis and visualization. The data are means of at least two independent experiments.
